# Supplementary material
Source: publisher site journal article supplement (https://www.dovepress.com/article/352636)
Supplement: Supplementary file 1 [file get_supplementary_file.php]

**Supplementary file 1** The doctor-patient relationship questionnaire for patient

| Dimension    | No | Item(CHINESE)            | Item(ENGLISH)                                                                        | Strongly disagree | Disagree | Neutral | Agree | Strongly agree |
|--------------|----|--------------------------|--------------------------------------------------------------------------------------|-------------------|----------|---------|-------|----------------|
| family trust | 1  | 与家人相处时，可以相互信任            | When you get along with your family, you can trust each other                        | 1                 | 2        | 3       | 4     | 5              |
|              | 2  | 家人能够对我的治疗提供足够的支持         | My family can provide enough support for my treatment.                               | 1                 | 2        | 3       | 4     | 5              |
|              | 3  | 我非常愿意与家人分享生活或工作中的感受      | I would like to share my life or work experience with my family                      | 1                 | 2        | 3       | 4     | 5              |
|              | 4  | 在遇到困难时，家人能互帮互助           | Families can help each other in times of difficulty                                  | 1                 | 2        | 3       | 4     | 5              |
|              | 5  | 与家人沟通时，总是能够敞开心扉          | Always be open when communicating with family                                        | 1                 | 2        | 3       | 4     | 5              |
|              | 6  | 遇到重大决定时，我总是先与家人商量        | When I come across a big decision, I always consult with my family first             | 1                 | 2        | 3       | 4     | 5              |
|              | 7  | 我愿意倾听家人的忠告并付诸实践          | I would like to listen to my family's advice and put it into practice                | 1                 | 2        | 3       | 4     | 5              |
|              | 8  | 家人的承诺一般都能兑现              | Family commitments are usually fulfilled                                             | 1                 | 2        | 3       | 4     | 5              |
|              | 9  | 与其他人相比，我更信任家人            | I trust my family more than anyone else                                              | 1                 | 2        | 3       | 4     | 5              |
| social trust | 1  | 我身边的多数人能够兑现自己的诺言         | Most of the people around me can keep their promises                                 | 1                 | 2        | 3       | 4     | 5              |
|              | 2  | 从媒体报道中，我们很难得到关于公共事件的客观信息 | It's hard for us to get objective information about public events from media reports | 1                 | 2        | 3       | 4     | 5              |

|                      |   |                                        |                                                                                                                                                                       |   |   |   |   |   |
|----------------------|---|----------------------------------------|-----------------------------------------------------------------------------------------------------------------------------------------------------------------------|---|---|---|---|---|
|                      | 3 | 我因事短期外出可以请同事（朋友）帮我照看重要的人或物（如孩子、绿植、宠物等） | I can ask colleagues (friends) to take care of important people or things (such as children, green plants, pets, etc.) when I go out for a short time due to business | 1 | 2 | 3 | 4 | 5 |
|                      | 4 | 我借钱给同事（朋友）一般不写借条                       | I usually don't write a note when I lend money to my colleagues (friends)                                                                                             | 1 | 2 | 3 | 4 | 5 |
|                      | 5 | 我愿意向同事（朋友）倾诉个人家事以获得建议和支持               | I would like to share my family affairs with my colleagues (friends) for advice and support                                                                           | 1 | 2 | 3 | 4 | 5 |
|                      | 6 | 大多数同事（朋友）相处时会相互给面子                     | Most of the colleagues (friends) will give face to each other when they get along                                                                                     | 1 | 2 | 3 | 4 | 5 |
|                      | 7 | 与陌生人打交道时，会心存戒备                         | Be alert when dealing with strangers                                                                                                                                  | 1 | 2 | 3 | 4 | 5 |
| doctor-patient trust | 1 | 医院公开的信息（药品价格、服务项目、人员信息等）是可以信赖的         | The hospital's public information (drug price, service items, personnel information, etc.) is reliable                                                                | 1 | 2 | 3 | 4 | 5 |
|                      | 2 | 医院的环境令患者满意                             | The hospital environment is satisfactory to patients                                                                                                                  | 1 | 2 | 3 | 4 | 5 |
|                      | 3 | 医生愿意倾听患者的诉说                            | Doctors are willing to listen to patients                                                                                                                             | 1 | 2 | 3 | 4 | 5 |
|                      | 4 | 医生能够耐心地解答患者的问题                         | Doctors can patiently answer patients' questions                                                                                                                      | 1 | 2 | 3 | 4 | 5 |
|                      | 5 | 医生的话语让患者感到安慰                           | The doctor's words comforted the patient                                                                                                                              | 1 | 2 | 3 | 4 | 5 |
|                      | 6 | 医生让患者做的检查和化验是必要的                       | It's necessary for the doctor to ask the patient to do the                                                                                                            | 1 | 2 | 3 | 4 | 5 |

|    |                  |                                                                            |   |   |   |   |   |  |
|----|------------------|----------------------------------------------------------------------------|---|---|---|---|---|--|
|    |                  | examination and test                                                       |   |   |   |   |   |  |
| 7  | 医生向患者解释了药品的效果和用量 | The doctor explained the effect and dosage of the medicine to the patient  | 1 | 2 | 3 | 4 | 5 |  |
| 8  | 医生能够让患者获得满意的诊疗效果 | Doctors can make patients get satisfactory diagnosis and treatment results | 1 | 2 | 3 | 4 | 5 |  |
| 9  | 医生会把患者的利益放在第一位   | Doctors put patients' interests first                                      | 1 | 2 | 3 | 4 | 5 |  |
| 10 | 医生能够对患者的病情做出正确诊断 | Doctors can make correct diagnosis of patients' condition                  | 1 | 2 | 3 | 4 | 5 |  |
| 11 | 患者对医生总体上是信任的     | Patients generally trust doctors                                           | 1 | 2 | 3 | 4 | 5 |  |
| 12 | 患者就诊时会关心医院的规章制度  | Patients will care about the rules and regulations of the hospital         | 1 | 2 | 3 | 4 | 5 |  |
| 13 | 医院诊疗设备能够满足患者需求   | Hospital diagnosis and treatment equipment can meet the needs of patients  | 1 | 2 | 3 | 4 | 5 |  |
| 14 | 医院药品种类能够满足患者需求   | Hospital drugs can meet the needs of patients                              | 1 | 2 | 3 | 4 | 5 |  |
| 15 | 医院药品质量能够让患者放心    | Hospital drug quality can make patients feel relieved                      | 1 | 2 | 3 | 4 | 5 |  |

**Supplementary file 2** The doctor-patient relationship questionnaire for doctor

| Dimension    | No | Item(CHINESE)                          | Item(ENGLISH)                                                                                                          | Strongly disagree | Disagree | Neutral | Agree | Strongly agree |
|--------------|----|----------------------------------------|------------------------------------------------------------------------------------------------------------------------|-------------------|----------|---------|-------|----------------|
| family trust | 1  | 与家人相处时，可以相互信任                          | When you get along with your family, you can trust each other                                                          | 1                 | 2        | 3       | 4     | 5              |
|              | 2  | 家人能够对我的治疗提供足够的支持                       | My family can provide enough support for my treatment                                                                  | 1                 | 2        | 3       | 4     | 5              |
|              | 3  | 我非常愿意与家人分享生活或工作中的感受                    | I would like to share my life or work experience with my family                                                        | 1                 | 2        | 3       | 4     | 5              |
|              | 4  | 在遇到困难时，家人能互帮互助                         | Families can help each other in times of difficulty                                                                    | 1                 | 2        | 3       | 4     | 5              |
|              | 5  | 与家人沟通时，总是能够敞开心扉                        | Always be open when communicating with family                                                                          | 1                 | 2        | 3       | 4     | 5              |
|              | 6  | 遇到重大决定时，我总是先与家人商量                      | When I come across a big decision, I always consult with my family first                                               | 1                 | 2        | 3       | 4     | 5              |
|              | 7  | 我愿意倾听家人的忠告并付诸实践                        | I would like to listen to my family's advice and put it into practice                                                  | 1                 | 2        | 3       | 4     | 5              |
|              | 8  | 家人的承诺一般都能兑现                            | Family commitments are usually fulfilled                                                                               | 1                 | 2        | 3       | 4     | 5              |
|              | 9  | 与其他人相比，我更信任家人                          | I trust my family more than anyone else                                                                                | 1                 | 2        | 3       | 4     | 5              |
| social trust | 1  | 我身边的多数人能够兑现自己的诺言                       | Most of the people around me can keep their promises                                                                   | 1                 | 2        | 3       | 4     | 5              |
|              | 2  | 从媒体报道中，我们很难得到关于公共事件的客观信息               | It's hard for us to get objective information about public events from media reports                                   | 1                 | 2        | 3       | 4     | 5              |
|              | 3  | 我因事短期外出可以请同事（朋友）帮我照看重要的人或物（如孩子、绿植、宠物等） | I can ask colleagues (friends) to take care of important people or things (such as children, green plants, pets, etc.) | 1                 | 2        | 3       | 4     | 5              |

|                      |   |                                |                                                                                                        |   |   |   |   |   |
|----------------------|---|--------------------------------|--------------------------------------------------------------------------------------------------------|---|---|---|---|---|
|                      |   |                                | when I go out for a short time due to business                                                         |   |   |   |   |   |
|                      | 4 | 我借钱给同事（朋友）一般不写借条               | I usually don't write a note when I lend money to my colleagues (friends)                              | 1 | 2 | 3 | 4 | 5 |
|                      | 5 | 我愿意向同事（朋友）倾诉个人家事以获得建议和支持       | I would like to share my family affairs with my colleagues (friends) for advice and support            | 1 | 2 | 3 | 4 | 5 |
|                      | 6 | 大多数同事（朋友）相处时会相互给面子             | Most of the colleagues (friends) will give face to each other when they get along                      | 1 | 2 | 3 | 4 | 5 |
|                      | 7 | 与陌生人打交道时，会心存戒备                 | Be alert when dealing with strangers                                                                   | 1 | 2 | 3 | 4 | 5 |
| doctor-patient trust | 1 | 医院公开的信息（药品价格、服务项目、人员信息等）是可以信赖的 | The hospital's public information (drug price, service items, personnel information, etc.) is reliable | 1 | 2 | 3 | 4 | 5 |
|                      | 2 | 医院的环境令患者满意                     | The hospital environment is satisfactory to patients                                                   | 1 | 2 | 3 | 4 | 5 |
|                      | 3 | 医生愿意倾听患者的诉说                    | Doctors are willing to listen to patients                                                              | 1 | 2 | 3 | 4 | 5 |
|                      | 4 | 医生能够耐心地解答患者的问题                 | Doctors can patiently answer patients' questions                                                       | 1 | 2 | 3 | 4 | 5 |
|                      | 5 | 医生让患者做的检查和化验是必要的               | It's necessary for the doctor to ask the patient to do the examination and test                        | 1 | 2 | 3 | 4 | 5 |
|                      | 6 | 医生向患者解释了药品的效果和用量               | The doctor explained the effect and dosage of the medicine to the patient                              | 1 | 2 | 3 | 4 | 5 |
|                      | 7 | 医生会把患者的利益放在第一位                 | Doctors put patients' interests first                                                                  | 1 | 2 | 3 | 4 | 5 |
|                      | 8 | 医生能够对患者的病情做出正确诊断               | Doctors can make correct diagnosis of patients' condition                                              | 1 | 2 | 3 | 4 | 5 |

|  |    |                 |                                                                           |   |   |   |   |   |
|--|----|-----------------|---------------------------------------------------------------------------|---|---|---|---|---|
|  | 9  | 患者对医生总体上是信任的    | Patients generally trust doctors                                          | 1 | 2 | 3 | 4 | 5 |
|  | 10 | 患者就诊时会关心医院的规章制度 | Patients will care about the rules and regulations of the hospital        | 1 | 2 | 3 | 4 | 5 |
|  | 11 | 医院诊疗设备能够满足患者需求  | Hospital diagnosis and treatment equipment can meet the needs of patients | 1 | 2 | 3 | 4 | 5 |
|  | 12 | 医院药品种类能够满足患者需求  | Hospital drugs can meet the needs of patients                             | 1 | 2 | 3 | 4 | 5 |
|  | 13 | 医院药品质量能够让患者放心   | Hospital drug quality can make patients feel relieved                     | 1 | 2 | 3 | 4 | 5 |
